# Supplementary material for: Perspectives of people with dementia and carers on advance care planning and end-of-life care: A systematic review and thematic synthesis of qualitative studies
Source: PubMed Central journal article supplement (PMC6376607; doi:10.1177/0269216318809571), 2018-11-08
Supplement: 809571_supp_mat.pdf [file 809571_supp_mat.pdf]

**Supplementary Table S1.** Search strategies

| #  | <b>MEDLINE 1946 to 6<sup>th</sup> July 2018</b><br>Total search results = 629 | <b>Embase 1947 to 6<sup>th</sup> July 2018</b><br>Total search results = 948 | <b>PsycINFO 1806 to 6<sup>th</sup> July 2018</b><br>Total search results = 363 | <b>CINAHL 1905 to 6<sup>th</sup> July 2018</b><br>Total search results = 688 |
|----|-------------------------------------------------------------------------------|------------------------------------------------------------------------------|--------------------------------------------------------------------------------|------------------------------------------------------------------------------|
| 1  | exp Adult/                                                                    | exp Adult/                                                                   | exp Patients/                                                                  | exp Adult/                                                                   |
| 2  | exp Patients/                                                                 | exp Patients/                                                                | exp Caregivers/                                                                | exp Patients/                                                                |
| 3  | exp Caregivers/                                                               | exp Caregivers/                                                              | exp Family/                                                                    | exp Caregivers/                                                              |
| 4  | exp Family/                                                                   | exp Family/                                                                  | exp Spouses/                                                                   | exp Family/                                                                  |
| 5  | exp Spouses/                                                                  | exp Spouse/                                                                  | exp Aging/                                                                     | exp Spouses/                                                                 |
| 6  | exp Aged/                                                                     | exp Aged/                                                                    | exp Guardianship/                                                              | exp Aged/                                                                    |
| 7  | exp Legal Guardians/                                                          | exp Legal Guardians/                                                         | Client*.tw.                                                                    | exp Guardianship, Legal/                                                     |
| 8  | Client*.tw.                                                                   | exp Proxy/                                                                   | Or/1-7                                                                         | Client*.tw.                                                                  |
| 9  | Or/1-8                                                                        | Client*.tw.                                                                  | exp Dementia/                                                                  | Or/1-8                                                                       |
| 10 | exp Dementia/                                                                 | Or/1-9                                                                       | exp Alzheimer's Disease/                                                       | exp Delirium, Dementia, Amnestic,<br>Cognitive Disorders/                    |
| 11 | exp Neurocognitive Disorders/                                                 | exp Dementia/                                                                | Dement*.tw.                                                                    | exp Dementia                                                                 |
| 12 | Dement*.tw.                                                                   | exp disorders of higher cerebral<br>function                                 | Alzheimer*.tw.                                                                 | Dement*.tw.                                                                  |
| 13 | Alzheimer*.tw.                                                                | Dement*.tw.                                                                  | mild cognitive impair*.tw.                                                     | Alzheimer*.tw.                                                               |
| 14 | mild cognitive impair*.tw.                                                    | Alzheimer*.tw.                                                               | lewy bod*.tw.                                                                  | mild cognitive impair*.tw.                                                   |
| 15 | lewy bod*.tw.                                                                 | lewy bod*.tw.                                                                | vascular cognitive impair*.tw.                                                 | lewy bod*.tw.                                                                |
| 16 | vascular cognitive impair*.tw.                                                | vascular cognitive impair*.tw.                                               | Or/9-15                                                                        | vascular cognitive impair*.tw.                                               |

|    |                                           |                                |                                           |                                           |
|----|-------------------------------------------|--------------------------------|-------------------------------------------|-------------------------------------------|
| 17 | Or/10-16                                  | Or/11-16                       | 8 and 16                                  | Or/10-16                                  |
| 18 | 9 and 17                                  | 10 and 17                      | exp advance directives/                   | 9 and 17                                  |
| 19 | exp advance care planning/                | exp living will/               | Advance care plan*.tw.                    | exp decision making/                      |
| 20 | exp advance directives/                   | advance care plan*.tw.         | living will*.tw.                          | Advance care plan*.tw.                    |
| 21 | living will*.tw.                          | advance directive*.tw.         | exp decision making/                      | exp advance directives/                   |
| 22 | exp decision making/                      | exp decision making/           | exp life-sustaining treatment/            | life-sustaining treatment preference*.tw. |
| 23 | life-sustaining treatment preference*.tw. | exp life-sustaining treatment/ | life-sustaining treatment preference*.tw. | exp Terminal Care                         |
| 24 | exp Terminal Care/                        | exp Terminal Care/             | Terminal*.tw.                             | exp emergency treatment/                  |
| 25 | end-of-life*.tw.                          | end-of-life*.tw.               | end-of-life*.tw.                          | end-of-life*                              |
| 26 | exp Attitude to Death/                    | exp Attitude to Death/         | exp Death and Dying/                      | exp Attitude to Death/                    |
| 27 | exp Palliative care/                      | exp Palliative therapy/        | exp Death Attitudes                       | exp Palliative care/                      |
| 28 | Or/19-27                                  | Or/19-27                       | exp Palliative care/                      | Or/19-27                                  |
| 29 | 18 and 28                                 | 18 and 28                      | Or/18-28                                  | 18 and 28                                 |
| 30 | exp qualitative research/                 | exp qualitative research/      | 17 and 29                                 | exp qualitative studies/                  |
| 31 | Qualitative*.tw.                          | Qualitative*.tw.               | exp qualitative methods/                  | Qualitative*.tw.                          |
| 32 | interview*.tw.                            | interview*.tw.                 | exp qualitative research/                 | interview*.tw.                            |
| 33 | focus group*.tw.                          | focus group*.tw.               | Qualitative*.tw.                          | focus group*.tw.                          |
| 34 | thematic*.tw.                             | thematic*.tw.                  | interview*.tw.                            | thematic*.tw.                             |
| 35 | grounded theory.tw.                       | grounded theory.tw.            | focus group*.tw.                          | grounded theory.tw.                       |

|    |                      |                      |                      |                      |
|----|----------------------|----------------------|----------------------|----------------------|
| 36 | phenomenol*.tw.      | phenomenol*.tw.      | thematic*.tw.        | phenomenol*.tw.      |
| 37 | content analysis.tw. | content analysis.tw. | grounded theory.tw.  | content analysis.tw. |
| 38 | ethnograph*.tw.      | ethnograph*.tw.      | phenomenol*.tw.      | ethnograph*.tw.      |
| 39 | or/30-38             | or/30-38             | content analysis.tw. | or/30-38             |
| 40 | 29 and 39            | 29 and 39            | ethnograph*.tw.      | 29 and 39            |
| 41 |                      |                      | or/31-40             |                      |
| 42 |                      |                      | 30 and 41            |                      |

**Supplementary Table S2.** Characteristics of the Included Studies

| Study                         | Country | No. of Person with dementia | Person with dementia age (mean [range]) | No. of CG | CG age (mean [range]) | Care Setting                                              | Dementia Stage                                        | Dementia Type                                                                                                                                                     | Methodology                                                                  | Qualitative Data Collection                           | Analysis                                | Topic                                                                |
|-------------------------------|---------|-----------------------------|-----------------------------------------|-----------|-----------------------|-----------------------------------------------------------|-------------------------------------------------------|-------------------------------------------------------------------------------------------------------------------------------------------------------------------|------------------------------------------------------------------------------|-------------------------------------------------------|-----------------------------------------|----------------------------------------------------------------------|
| Albinsson <sup>1</sup> (2011) | SE      | -                           | -                                       | 20        | [42-81]               | Nursing home; daycare centre; private group dwelling      | Moderately severe or severe (advanced-stage) dementia | Alzheimer's (n=12)                                                                                                                                                | Qualitative design                                                           | Explorative interviews (face-to-face)                 | Hermeneutic approach                    | Existential concerns at End-of-Life                                  |
| Almberg <sup>2</sup> (2000)   | SE      | -                           | -                                       | 30        | 71 [49-88]            | Nursing home (institutionalised)                          | NS                                                    | Alzheimer's (n=53); Frontal temporal lobe (n=5); Lewy body (n=7); Parkinson's disease (n=1); Vascular (n=6); Wernicke-Korsakoff (n=1); Mixed (n=3); Unknown (n=8) | Qualitative design                                                           | Face-to-face interviews with open-ended questions     | Content analysis                        | Bereavement and social support at End-of-Life                        |
| Andrews <sup>3</sup> (2017)   | AU      | -                           | -                                       | 10        | NS                    | Dementia specific care unit                               | Advanced dementia                                     | NS                                                                                                                                                                | Qualitative design                                                           | Semi-structured, audio-recorded individual interviews | Thematic analysis                       | Family members' understandings about the terminal nature of dementia |
| Ashton <sup>4</sup> (2016)    | UK      | -                           | -                                       | 12        | [35-82]               | Nursing home                                              | Advanced dementia                                     | Alzheimer's; Huntington's disease; Lewy bodies; Vascular; mixed-type; early onset dementia                                                                        | Descriptive qualitative design (based on principles of naturalistic inquiry) | Semi-structured, in-depth interviews                  | Content analysis                        | Experiences of Advance Care Planning                                 |
| Beernaert <sup>5</sup> (2016) | NL      | 6                           | [67-86]                                 | -         | -                     | Community                                                 | NS                                                    | Alzheimer's (n=5)                                                                                                                                                 | NS                                                                           | Face-to-face semi-structured interviews               | Thematic content and narrative analysis | Palliative care in patients with life-limiting illnesses             |
| Beernaert <sup>6</sup> (2015) | NL      | 6                           | [67-86]                                 | -         | -                     | Community                                                 | NS                                                    | Alzheimer's (n=1)                                                                                                                                                 | NS                                                                           | Face-to-face semi-structured interviews               | Thematic content analysis               | Family physicians' role in palliative care                           |
| Beiseker <sup>7</sup> (1997)  | US      | -                           | -                                       | 104       | 63.6 [27-88]          | Community; Nursing home; Veterans Administration facility | NS                                                    | Alzheimer's (n=16); Mixed-type (n=3); Vascular (n=1)                                                                                                              | NS                                                                           | Semi-structured interviews                            | NS                                      | Communication between carers and physicians                          |
| Black <sup>8</sup> (2009)     | US      | -                           | -                                       | 34        | 61 [37-79]            | Nursing home                                              | NS                                                    | Alzheimer's (n=16); Vascular (n=18); Mixed-type (n=7); Lewy bodies (n=2); Frontotemporal (n=1)                                                                    | Descriptive qualitative                                                      | Face-to-face, Semistructured field guides             | Iterative process                       | SDM's understanding of patient preferences                           |

| Study                         | Country | No. of Person with dementia | Person with dementia age (mean [range]) | No. of CG | CG age (mean [range]) | Care Setting                                     | Dementia Stage          | Dementia Type                                                                                             | Methodology                        | Qualitative Data Collection          | Analysis                                                       | Topic                                    |
|-------------------------------|---------|-----------------------------|-----------------------------------------|-----------|-----------------------|--------------------------------------------------|-------------------------|-----------------------------------------------------------------------------------------------------------|------------------------------------|--------------------------------------|----------------------------------------------------------------|------------------------------------------|
| Bonnel <sup>9</sup> (1996)    | US      | -                           | -                                       | 1         | 79                    | Community ; Nursing home                         | Advanced-stage dementia | Alzheimer's (n=20)                                                                                        | Qualitative case report            | Broad open-ended interviews          | Content analysis                                               | Spouse experience of Alzheimer's Disease |
| Bosek <sup>10</sup> (2003)    | US      | -                           | -                                       | 57        | NS                    | Nursing home                                     | NS                      | Alzheimer's (n=3); Lewy body (n=2); Pick's disease (n=1); Vascular/multi-infarct (n=2); Unspecified (n=6) | NS                                 | Semi structured, in-depth interviews | NS                                                             | Having a "good death"                    |
| Boyd <sup>11</sup> (2011)     | SL      | 12                          | NS                                      | 12        | NS                    | NS                                               | Early-stage dementia    | Alzheimer's 104                                                                                           | NS                                 | Interviews                           | NS                                                             | End-of-Life care                         |
| Cahill <sup>12</sup> (2012)   | IE      | -                           | -                                       | 16        | 77 [62-88]            | Nursing home; hospital                           | End-stage dementia      | Alzheimer's disease                                                                                       | NS                                 | In-depth qualitative interviews      | Qualitative thematic analysis                                  | Carer experience at End of Life          |
| Cairns <sup>13</sup> (2012)   | UK      | -                           | -                                       | 5         | [62-84]               | Residential care                                 | NS                      | Alzheimer's late onset (n=4); Mixed-type Alzheimer's (n=4); Alzheimer's of unspecified type (n=1)         | Psychodynamic                      | Semi-structured interviews           | NS                                                             | Residential care placement               |
| Caron <sup>14</sup> (2005)    | CA      | -                           | -                                       | 24        | [40-83]               | Long-term care facility                          | Advanced-stage dementia | Alzheimer's late onset (n=5); Mixed-type Alzheimer's (n=1)                                                | Grounded theory                    | Open-ended interviews                | Constant-comparative method; line-by-line/dimensional analysis | End-of-Life decision making              |
| Caron <sup>15</sup> (2005)    | CA      | -                           | -                                       | 24        | [40-83]               | Long-term care facility                          | Advanced-stage dementia | NS                                                                                                        | Grounded theory                    | Open-ended interviews                | Constant-comparative method; line-by-line/dimensional analysis | End-of-Life decision making              |
| Cronfalk <sup>16</sup> (2017) | SE      | -                           | -                                       | 10        | NS                    | Nursing home                                     | NS                      | NS                                                                                                        | Descriptive design                 | face-to-face interviews              | Qualitative content analysis                                   | Nursing home placement                   |
| Crowther <sup>17</sup> (2013) | UK      | -                           | -                                       | 40        | [18-86]               | Community ; District general hospital; Care home | NS                      | NS                                                                                                        | Grounded Theory and phenomenology. | Unstructured narrative interviewing  | NS                                                             | End-of-Life care                         |
| Davies <sup>18</sup> (2017)   | UK      | -                           | -                                       | 47        | [39-90]               | Community ; Hospital; Care home; Hospice         | NS                      | NS                                                                                                        | Qualitative methods                | Face-to-face, in-depth interviews    | Thematic analysis                                              | Quality End-of-Life care                 |

| Study                               | Country | No. of Person with dementia | Person with dementia age (mean [range]) | No. of CG | CG age (mean [range]) | Care Setting      | Dementia Stage                       | Dementia Type | Methodology                                            | Qualitative Data Collection                                              | Analysis                     | Topic                                           |
|-------------------------------------|---------|-----------------------------|-----------------------------------------|-----------|-----------------------|-------------------|--------------------------------------|---------------|--------------------------------------------------------|--------------------------------------------------------------------------|------------------------------|-------------------------------------------------|
| de Boer <sup>19</sup> (2012)        | NL      | 24                          | 76.3 [65-89]                            | -         | -                     | Community         | Early-stage dementia                 | NS            | NS                                                     | Semi-structured interview guides, face-to-face with open-ended questions | Iterative analysis           | ACP                                             |
| de Vries <sup>20</sup> (2013)       | UK      | -                           | -                                       | 2         | NS                    | Hospital; Hospice | NS                                   | NS            | Inductive approach through grounded theory methodology | Single interviews                                                        | NS                           | End-of-Life care                                |
| Dening <sup>21</sup> (2012)         | UK      | -                           | -                                       | 7         | NS                    | NS                | NS                                   | NS            | NS                                                     | Topic guide to lead semi-structured interviews                           | Thematic content analysis    | Barriers to End-of-Life care                    |
| Dening <sup>22</sup> (2013)         | UK      | 8                           | 83.3                                    | 9         | 69.2                  | Community         | NS                                   | NS            | NS                                                     | Modified nominal group technique                                         | Qualitative content analysis | Preferences for End-of-Life care                |
| Dening <sup>23</sup> (2017)         | UK      | 6                           | 77.6 [70-88]                            | 7         | 73.4 [49-85]          | Community         | NS                                   | NS            | Qualitative approach (naturalistic interpretative)     | Semi-structured interview with three open-ended questions                | Content analysis             | Health-care decision making in dementia         |
| Dickinson <sup>24</sup> (2013)      | UK      | 17                          | [46-96]                                 | 29        | [44-89]               | NS                | Mild to moderate dementia            | NS            | NS                                                     | Semi-structured interviews                                               | Thematic analysis            | Views on ACP                                    |
| Fethertonhough <sup>25</sup> (2017) | AU      | -                           | -                                       | 34        | 57.4                  | Community ; RACF  | NS                                   | NS            | Qualitative design                                     | Semi-structured face-to-face or telephone interviews                     | Thematic analysis            | Surrogate decision-making                       |
| Fleming <sup>26</sup> (2015)        | AU      | 2                           | NS                                      | 11        | NS                    | NS                | Severe stage dementia                | NS            | Mixed-method design                                    | Focus groups                                                             | NS                           | Environmental design at End-of-Life in dementia |
| Forbes <sup>27</sup> (2012)         | CA      | 5                           | 77.4 [63-95]                            | 14        | 60.3 [39-91]          | Community         | NS                                   | NS            | Qualitative interpretative descriptive approach        | Face-to-face interviews                                                  | Lubrosky's thematic analysis | Stages of dementia care journey                 |
| Forbes <sup>28</sup> (2000)         | US      | -                           | -                                       | 28        | 66 [41-85]            | Nursing home      | Moderately severe or severe dementia | NS            | Naturalistic approach                                  | Qualitative focus groups                                                 | Qualitative content analysis | End-of Life decision making                     |

| Study                                 | Country | No. of Person with dementia | Person with dementia age (mean [range]) | No. of CG | CG age (mean [range]) | Care Setting                                           | Dementia Stage                              | Dementia Type | Methodology                                                 | Qualitative Data Collection                                     | Analysis                                                       | Topic                                              |
|---------------------------------------|---------|-----------------------------|-----------------------------------------|-----------|-----------------------|--------------------------------------------------------|---------------------------------------------|---------------|-------------------------------------------------------------|-----------------------------------------------------------------|----------------------------------------------------------------|----------------------------------------------------|
| Gessert <sup>29</sup> (2006)          | US      | 35                          | 88                                      | 38        | 62                    | Nursing home                                           | Severe cognitive impairment;                | NS            | NS                                                          | Focus groups with interview guide                               | NS                                                             | Attitudes towards end-of-life decision making      |
| Gessert <sup>30</sup> (2000)          | US      | -                           | -                                       | 28        | NS                    | Nursing home                                           | Moderately severe to severe dementia        | NS            | Qualitative design                                          | Focus groups with interview guide                               | Qualitative content analysis                                   | End-of Life decision making                        |
| Givens <sup>31</sup> (2012)           | US      | -                           | -                                       | 16        | 62                    | Nursing home                                           | Advanced dementia                           | NS            | NS                                                          | Semi-structured interviews                                      | NS                                                             | Carer burden                                       |
| Glass <sup>32</sup> (2016)            | US      | -                           | -                                       | 4         | [65-80s]              | Community ; Hospice; Nursing home;                     | NS                                          | NS            | Phenomenological qualitative approach; multiple case design | Narrative interview (interview guide with open-ended questions) | NS                                                             | Site for End-of-Life care                          |
| Godwin <sup>33</sup> (2009)           | UK      | 12                          | NS                                      | 12        | NS                    | Hospital wards; Hospice; Nursing home                  | Advanced dementia                           | NS            | NS                                                          | Interviews with open-ended questions                            | NS                                                             | End-of-Life care                                   |
| Goodman <sup>34</sup> (2013)          | UK      | 18                          | [68.7-92]                               | -         | -                     | Care homes                                             | NS                                          | NS            | Exploratory qualitative                                     | Semistructured, conversational interviews                       | NS                                                             | Preferences for End-of-Life care                   |
| Groen van de Ven <sup>35</sup> (2016) | NL      | 23                          | [62-89]                                 | 44        | NS                    | Community ; Institutions (sheltered and Nursing homes) | Beginning , moderate, and advanced dementia | NS            | Prospective, qualitative, multi-perspective design          | Semistructured interviews using an interview guide              | Content analysis; timeline method; constant comparative method | Decision trajectories in dementia care             |
| Groen van de Ven <sup>36</sup> (2016) | NL      | 23                          | [62-89]                                 | 44        | NS                    | Community ; Institutions (sheltered and Nursing homes) | Beginning , moderate, and advanced dementia | NS            | Qualitative, multi-perspective design                       | Semistructured interviews using an interview guide              | Content analysis; constant comparative method                  | Challenges of shared decision making in dementia   |
| Hill <sup>37</sup> (2016)             | UK      | 14                          | NS                                      | 43        | NS                    | NS                                                     | Early-stage dementia                        | NS            | Q-methodology                                               | Q-methodology post-sort questions                               | NS                                                             | End-of-Life care                                   |
| Hirschman <sup>38</sup> (2006)        | US      | -                           | -                                       | 30        | 64.3 [42-93]          | Community home; Assisted living facility               | Advanced dementia                           | NS            | NS                                                          | Semi-structured interviews                                      | NS                                                             | Barriers to substitute decision making             |
| Hirschman <sup>39</sup> (2008)        | US      | -                           | -                                       | 30        | 64.3 [42-93]          | Community home; Assisted living facility               | Advanced dementia                           | NS            | NS                                                          | Semi-structured interviews                                      | NS                                                             | Barriers to /facilitators to advance care planning |

| Study                                   | Country | No. of Person with dementia | Person with dementia age (mean [range]) | No. of CG | CG age (mean [range]) | Care Setting                                                   | Dementia Stage       | Dementia Type | Methodology                         | Qualitative Data Collection                                                                                | Analysis                     | Topic                                                   |
|-----------------------------------------|---------|-----------------------------|-----------------------------------------|-----------|-----------------------|----------------------------------------------------------------|----------------------|---------------|-------------------------------------|------------------------------------------------------------------------------------------------------------|------------------------------|---------------------------------------------------------|
| Gil <sup>40</sup> (2018)                | IL      | -                           | -                                       | 17        | [40-70s]              | Hospital                                                       | Advanced dementia    | NS            | NS                                  | Observation and interviews                                                                                 | Thematic approach            | End-of-life decision making                             |
| Hovland <sup>41</sup> (2016)            | US      | -                           | -                                       | 30        | [45-88]               | Community ; Hospital; Hospice; Skilled or rehab nursing centre | NS                   | NS            | Qualitative descriptive approach    | In-depth, qualitative interviews                                                                           | Qualitative content analysis | Preparedness for death                                  |
| Jenning <sup>42</sup> (2017)            | SZ      | 7                           | 71 [73-92]                              | 36        | 63 [42-85]            | Community                                                      | Early-stage dementia | NS            | NS                                  | Focus groups                                                                                               | NS                           | Goals for dementia care                                 |
| Jox <sup>43</sup> (2011)                | GER     | -                           | -                                       | 32        | 61 [31-82]            | RACF                                                           | NS                   | NS            | Qualitative study                   | Audiotaped verbalisations to vignettes                                                                     | Qualitative content analysis | Surrogate decision making                               |
| Juozapavicius <sup>44</sup> (2001)      | US      | -                           | -                                       | 20        | 63.9 [35 - >86]       | Community                                                      | NS                   | NS            | NS                                  | Interview with guide                                                                                       | Constant comparative method  | Caregiving experience in Alzheimer's                    |
| Lamahewa <sup>45</sup>                  | UK      | -                           | -                                       | 46        | NS                    | Community ; Hospital                                           | NS                   | NS            | Qualitative study                   | Semi-structured interviews and focus groups                                                                | Thematic analysis            | Decision-making at end-of-life                          |
| Lawrence <sup>46</sup> (2011)           | UK      | -                           | -                                       | 27        | NS                    | Care home; Community ; Continuing care unit; General hospital  | NS                   | NS            | NS                                  | In-depth interviews                                                                                        | NS                           | Dying well and End-of-Life care                         |
| Lewis <sup>47</sup> (2014)              | US      | -                           | -                                       | 11        | NS                    | Community ; Hospitals; Hospice; Nursing homes                  | NS                   | NS            | Descriptive phenomenological method | Interviews                                                                                                 | Colaizzi method              | Carer's experience with seeking hospice care            |
| Lewis <sup>48</sup> (2015) <sup>a</sup> | US      | -                           | -                                       | 101       | NS                    | Community ; Hospital; Hospice; Assisted living; Nursing home   | NS                   | NS            | Grounded theory                     | In-person interviews, online interviews, book and blog memoirs of caregivers, and participant observation. | Constant comparative method  | Caregiving at End-of-Life; Theory-making                |
| Livingston <sup>49</sup> (2010)         | UK      | -                           | -                                       | 46        | 62                    | Community ; Care home                                          | NS                   | NS            | Qualitative study/ Grounded Theory  | In-depth, semi-structured interviews                                                                       | Thematic analysis            | Barriers to /facilitators of substitute decision making |



| Study                            | Country | No. of Person with dementia | Person with dementia age (mean [range]) | No. of CG | CG age (mean [range]) | Care Setting                                                                        | Dementia Stage                                 | Dementia Type | Methodology                                          | Qualitative Data Collection                                                                        | Analysis                         | Topic                                                                  |
|----------------------------------|---------|-----------------------------|-----------------------------------------|-----------|-----------------------|-------------------------------------------------------------------------------------|------------------------------------------------|---------------|------------------------------------------------------|----------------------------------------------------------------------------------------------------|----------------------------------|------------------------------------------------------------------------|
| Livings-ton <sup>50</sup> (2013) | UK      | -                           | -                                       | 20        | [33-95]               | Care home                                                                           | NS                                             | NS            | NS                                                   | Qualitative interview, open questions with an interview guide                                      | Thematic analysis                | Intervention study at End-of-Life                                      |
| Mann <sup>51</sup> (2013)        | US      | -                           | -                                       | 16        | NS                    | Nursing home                                                                        | NS                                             | NS            | NS                                                   | Semi-structured qualitative interviews                                                             | Constant comparative method      | Do-not-hospitalise orders                                              |
| Muders <sup>52</sup> (2015)      | GER     | -                           | -                                       | 85        | NS                    | NS                                                                                  | NS                                             | NS            | NS                                                   | Cross-sectional survey, open-ended questions                                                       | Qualitative content analysis     | Carer's experience with caring for Person with dementia at end-of-life |
| Mulqueen <sup>53</sup> (2017)    | IE      | NS                          | NS                                      | -         | -                     | RACF                                                                                | Mild dementia                                  | NS            | NS                                                   | Nominal group technique                                                                            | Manifest content analysis method | Preferences for end-of-life care                                       |
| Noh <sup>54</sup> (2016)         | US      | -                           | -                                       | 20        | 63.4                  | Community ; Other unspecified                                                       | NS                                             | NS            | NS                                                   | Semi-structured telephone or face-to-face interviews                                               | Thematic analysis                | Proxies' perception of support in end-of-life decision making          |
| Pasman <sup>55</sup> (2004)      | NL      | -                           | -                                       | 32        | NS                    | Nursing home                                                                        | Middle-stage to severe (as per 3 case studies) | NS            | NS                                                   | Participant observation                                                                            | Constant comparison method       | Decision making on artificial nutrition and hydration                  |
| Peacock <sup>56</sup> (2014)     | CA      | -                           | -                                       | 11        | [49-89]               | Long-term care home                                                                 | Advanced dementia                              | NS            | Munhall's methodology for interpretive phenomenology | In-depth, open-ended interviews                                                                    | Hermeneutic approach             | End-of-life dementia caregiving experience                             |
| Peacock <sup>57</sup> (2014)     | CA      | -                           | -                                       | 11        | [49-89]               | Community ; Long-term care home                                                     | NS                                             | NS            | NS                                                   | Open-ended interviews                                                                              | Qualitative description approach | Dementia caregiving journey of bereaved carers                         |
| Poole <sup>58</sup> (2017)       | EN      | 11                          | NS                                      | 25        | NS                    | Community living; supported living; group living; standard nursing/residential care | Advanced Dementia                              | NS            | Social constructivist epistemological                | Q-sort methodology, with open-ended questions; face-to-face semi-structured qualitative interviews | Thematic analysis                | End-of-life care in dementia                                           |
| Poppe <sup>59</sup> (2013)       | UK      | 12                          | NS                                      | 8         | NS                    | Community                                                                           | Mild dementia                                  | NS            | NS                                                   | In-depth, open-ended interviews                                                                    | Constant comparison method       | Advance care planning in early dementia                                |

| Study                             | Country | No. of Person with dementia | Person with dementia age (mean [range]) | No. of CG | CG age (mean [range]) | Care Setting                                                                   | Dementia Stage                | Dementia Type | Methodology                                                             | Qualitative Data Collection                                   | Analysis                                                                        | Topic                                                                         |
|-----------------------------------|---------|-----------------------------|-----------------------------------------|-----------|-----------------------|--------------------------------------------------------------------------------|-------------------------------|---------------|-------------------------------------------------------------------------|---------------------------------------------------------------|---------------------------------------------------------------------------------|-------------------------------------------------------------------------------|
| Powers <sup>60</sup> (2008)       | US      | 6                           | NS                                      | NS        | NS                    | Hospice; Nursing home                                                          | NS                            | NS            | Concurrent mixed methods design (Qual strand: ethnographic field study) | Interviews with guides                                        | Content analysis                                                                | Palliative end-of-life care in dementia                                       |
| Robinson <sup>61</sup> (2000)     | US      | -                           | -                                       | 12        | [51-79]               | Long-term care facility                                                        | Advanced dementia             | NS            | Phenomenological study                                                  | Interviews                                                    | VanManen's selective and highlighting approach, with Linguistic transformation? | SDM's experience of implementing and advance care plan                        |
| Rosemond <sup>62</sup> (2017)     | US      | -                           | -                                       | 16        | NS                    | Nursing home                                                                   | Advanced dementia             | NS            | Qualitative study                                                       | Semi-structured interviews                                    | Qualitative description approach                                                | SDM's experience of goals-of-care decision making                             |
| Russell <sup>63</sup> (2008)      | AU      | -                           | -                                       | 15        | [35-75]               | Community ; Hospital; Nursing home                                             | Advanced to terminal dementia | NS            | NS                                                                      | Semistructured in-depth interviews, with open-ended questions | Thematic analysis                                                               | Carer's view on quality of life in advanced-terminal dementia                 |
| Saini <sup>64</sup> (2016)        | UK      | -                           | -                                       | 4         | [54-76]               | Nursing home                                                                   | Advanced dementia             | NS            | Ethnography                                                             | Semi-structured interviews using open-ended questions         | Thematic analysis                                                               | End-of-life discussions                                                       |
| Samia <sup>65</sup> (2012)        | US      | -                           | -                                       | 26        | <60-84]               | Community ; Other                                                              | NS                            | NS            | Qualitative descriptive study                                           | Focus groups                                                  | Content analysis                                                                | Learning needs/ challenges of carers participating in psychoeducation program |
| Sanders <sup>66</sup> (2009)      | US      | -                           | -                                       | 27        | [38-83]               | Community ; long-term care facility (assisted living or nursing home); hospice | End-stage dementia            | NS            | Ethnomethodology                                                        | Semi-structured interviews                                    | Constant comparative method;                                                    | Carers' response to end-stage dementia care                                   |
| Sarabia-Cobo <sup>67</sup> (2016) | SPN     | -                           | -                                       | 84        | 66 [36-87]            | Nursing home                                                                   | Moderate to severe dementia   | NS            | Naturalistic approach                                                   | Qualitative focus groups (Krueger method)                     | Qualitative content analysis                                                    | End-of-Life decision making                                                   |
| Shanley <sup>68</sup> (2017)      | AU      | -                           | -                                       | 34        | 57.4                  | Community ; RACF                                                               | NS                            | NS            | Qualitative study                                                       | Semi-structured face-to-face or telephone interviews          | Thematic analysis                                                               | SDM's support needs                                                           |

| Study                                    | Country | No. of Person with dementia | Person with dementia age (mean [range]) | No. of CG | CG age (mean [range]) | Care Setting                                       | Dementia Stage                       | Dementia Type | Methodology                                                                                                       | Qualitative Data Collection                                                             | Analysis                        | Topic                                                    |
|------------------------------------------|---------|-----------------------------|-----------------------------------------|-----------|-----------------------|----------------------------------------------------|--------------------------------------|---------------|-------------------------------------------------------------------------------------------------------------------|-----------------------------------------------------------------------------------------|---------------------------------|----------------------------------------------------------|
| Shanley <sup>69</sup> (2011)             | AU      | -                           | -                                       | 15        | [35-75]               | Community ; Hospital; Nursing home                 | Advanced and terminal stage dementia | NS            | NS                                                                                                                | Semi-structured in-depth interviews with open-ended questioning                         | Thematic analysis               | Family carer support needs                               |
| Shuter <sup>70</sup> (2014)              | AU      | -                           | -                                       | 13        | [54-82]               | Community ; Hospital; RACF                         | NS                                   | NS            | Kramer's Conceptual Model of Carer Adaptation; Cognitive-based Behavioural Conceptualisation of Complicated Grief | Semi-structured interviews with open-ended questions                                    | Problem-Driven Content Analysis | Grief and health outcomes of dementia carers             |
| Slape <sup>71</sup> (2014)               | AU      | -                           | -                                       | 10        | NS                    | RACF                                               | NS                                   | NS            | Hermeneutic phenomenological approach                                                                             | Semi-structured in-depth interviews                                                     | In-depth qualitative analysis   | Spiritual needs of family members                        |
| Snyder <sup>72</sup> (2013) <sup>b</sup> | US      | -                           | -                                       | 126       | 59.3                  | Nursing home                                       | Advanced dementia                    | NS            | NS                                                                                                                | Semi-structured interviews, open-ended questions about the advantages and disadvantages | NS                              | SDM's perceptions of feeding options                     |
| Stewart <sup>73</sup> (2011)             | US      | -                           | -                                       | 2         | NS                    | Residential and nursing care homes                 | NS                                   | NS            | NS                                                                                                                | Semi-structured interviews                                                              | Framework analysis              | ACP                                                      |
| Stewart - Archer <sup>74</sup> (2015)    | CA      | 136                         | NS                                      | -         | -                     | Community ; Supportive housing; Personal care home | NS                                   | NS            | NS                                                                                                                | Open-ended face-to-face interviews                                                      | Qualitative content analysis    | End-of-life care preferences                             |
| Stirling <sup>75</sup> (2014)            | AU      | -                           | -                                       | 11        | NS                    | NS                                                 | NS                                   | NS            | NS                                                                                                                | Family interviews                                                                       | Thematic analysis               | Development of "dying" discussion tool                   |
| Tarter <sup>76</sup> (2016)              | US      | -                           | -                                       | 51        | 62.4                  | Hospice                                            | NS                                   | NS            | NS                                                                                                                | Secondary data from audio-recordings of therapy intervention session                    | Thematic analysis               | Hospice pain management                                  |
| The <sup>77</sup> (2002)                 | NL      | 35                          | [61-98]                                 | 32        | NS                    | Nursing home                                       | NS                                   | NS            | Ethnography                                                                                                       | Comprehensive notes of observations and informal; formal interviews                     | NS                              | Withholding artificial administration of fluids and food |

| Study                                     | Country | No. of Person with dementia | Person with dementia age (mean [range]) | No. of CG | CG age (mean [range]) | Care Setting                                   | Dementia Stage                                                                                                                                               | Dementia Type                            | Methodology                         | Qualitative Data Collection                                             | Analysis           | Topic                                                     |
|-------------------------------------------|---------|-----------------------------|-----------------------------------------|-----------|-----------------------|------------------------------------------------|--------------------------------------------------------------------------------------------------------------------------------------------------------------|------------------------------------------|-------------------------------------|-------------------------------------------------------------------------|--------------------|-----------------------------------------------------------|
| Thuné-Boyle <sup>78</sup> (2010)          | UK      | -                           | -                                       | 20        | [44-89]               | Community ; Nursing/residential home; Hospital | Advanced dementia                                                                                                                                            | NS                                       | Qualitative methodology             | Semi-structured interviews                                              | Framework analysis | End-of-life care needs                                    |
| Treloar <sup>79</sup> (2009)              | UK      | -                           | -                                       | 14        | 68.1 [36-91]          | Community ; Hospital; Nursing care home        | Scores of 6-7 (severe to very severe cognitive decline) as rated on Functional Assessment Staging (FAST). Stage 7 is the most advanced category of dementia. | NS                                       | NS                                  | Qualitative semi-structured questionnaire (allowing for free interview) | NS                 | Palliative and end of life care of dementia at home       |
| van der Steen <sup>80</sup> (2017)        | NL      | -                           | -                                       | 10        | [59-86]               | Community ; Nursing home                       | Advanced, terminal phase dementia                                                                                                                            | NS                                       | NS                                  | Focus groups                                                            | Thematic analysis  | Palliative care service development for terminal dementia |
| van Soest-Poortvliet <sup>81</sup> (2015) | NL      | -                           | -                                       | 20        | 61 [46-68]            | Nursing home                                   | Score 13 mean (8-20 range) on Bedford Alzheimer Nursing Severity-Scale (BANS-S); (Rating from 7-28; higher score means more severe dementia.                 | NS                                       | Qualitative descriptive methodology | Explorative, qualitative in-depth interviews                            | Thematic analysis  | ACP                                                       |
| Volicer <sup>82</sup> (2016)              | US      | -                           | -                                       | 15        | NS                    | Hospice                                        | Advanced dementia                                                                                                                                            | Variant Creutzfeldt-Jakob disease (vCJD) | NS                                  | Focus groups                                                            | NS                 | Acceptability of food-limiting advance directive          |
| Wakunami <sup>83</sup> (2009)             | JPN     | -                           | -                                       | 4         | [59-78]               | Community ; Hospital; Nursing home             | NS                                                                                                                                                           |                                          | Qualitative methodology             | Semi-structured interviews                                              | NS                 | Introducing end-of-life care to families                  |

| Study                                        | Country | No. of Person with dementia | Person with dementia age (mean [range]) | No. of CG | CG age (mean [range]) | Care Setting                                                                                | Dementia Stage | Dementia Type | Methodology | Qualitative Data Collection                          | Analysis          | Topic                                   |
|----------------------------------------------|---------|-----------------------------|-----------------------------------------|-----------|-----------------------|---------------------------------------------------------------------------------------------|----------------|---------------|-------------|------------------------------------------------------|-------------------|-----------------------------------------|
| Wladkowski <sup>84</sup> (2016) <sup>c</sup> | US      | -                           | -                                       | 24        | 63 [48–78]            | Community living facility; Assisted living facility; Skilled nursing facility; Hospice home | NS             | NS            | NS          | Semi-structured face-to-face or telephone interviews | Thematic analysis | Carer grief over live hospice discharge |

Abbreviations and definitions: ACP, advance care planning; AU, Australia; CA, Canada, Colaizzi method, analytical method using descriptive phenomenology; content analysis, deductive methodology that involves identification of codes prior to searching for their occurrence in the data; EoL, end of life; ethnography, to discover and describe individual social and cultural groups; GER, Germany; IE, Ireland; IS, Israel; JPN, Japan; mixed methods, include quantitative and qualitative methods; NL, Netherlands; nominal group technique, semi-evaluation method involving qualitative and quantitative approaches; NS, not state; phenomenology, to study peoples' understanding and interpretations of their experiences in their own terms and emphasizing these as explanations for their actions; Q-methodology, a mixed method combining qualitative and quantitative techniques to study subjectivity; RACF, residential aged care facility; SDM, substitute decision maker; SE, Sweden; SPN, Spain; SWZ, Switzerland; thematic analysis, concepts and theories are inductively derived from the data; UK, United Kingdom; US, United States.

a theoretical sample of 101 participants

b demographics based on 127 participants

c only 18 of 24 participants reported their ages

## References

1. Albinsson L, Strang P. Existential concerns of families of late-stage dementia patients: questions of freedom, choices, isolation, death, and meaning. *Journal Of Palliative Medicine*. 2003;6(2):225-35.
2. Almberg BE, Grafström M, Winblad B. Caregivers of relatives with dementia: experiences encompassing social support and bereavement. *Aging & Mental Health*. 2000;4(1):82-9.
3. Andrews S, McInerney F, Toye C, Parkinson C-A, Robinson A. Knowledge of Dementia: Do family members understand dementia as a terminal condition? *Dementia*. 2017;16(5):556-75.
4. Ashton SE, Roe B, Jack B, McClelland B. End of life care: The experiences of advance care planning amongst family caregivers of people with advanced dementia—A qualitative study. *Dementia*. 2016;15(5):958-75.
5. Beernaert K, Deliëns L, De Vleminck A, Devroey D, Pardon K, Van den Block L, et al. Is there a need for early palliative care in patients with life-limiting illnesses? Interview study with patients about experienced care needs from diagnosis onward. *American Journal of Hospice & Palliative Medicine*. 2016;33(5):489-97.
6. Beernaert K, Van den Block L, Van Thienen K, Devroey D, Pardon K, Deliëns L, et al. Family physicians' role in palliative care throughout the care continuum: stakeholder perspectives. *Family Practice*. 2015;32(6):694-700.
7. Beisecker AE, Chrisman SK, Wright LJ. Perceptions of family caregivers of persons with Alzheimer's disease: communication with physicians. *American Journal of Alzheimer's Disease*. 1997;12(2):73-83.
8. Black BS, Fogarty LA, Phillips H, Finucane T, Loreck DJ, Baker A, et al. Surrogate decision makers' understanding of dementia patients' prior wishes for end-of-life care. *Journal Of Aging And Health*. 2009;21(4):627-50.
9. Bonnel WB. Not gone and not forgotten: a spouse's experience of late-stage Alzheimer's disease. *Journal of Psychosocial Nursing & Mental Health Services*. 1996;34(8):23-40.
10. Bosek MSD, Lowry E, Lindeman DA, Burck R, Gwyther LP. Promoting a good death for persons with dementia in nursing facilities: family caregivers' perspectives. *JONA's Healthcare Law, Ethics & Regulation*. 2003;5(2):34-41.
11. Boyd R. End-of-life care. Discussing end-of-life care with people with dementia: a word of caution. *Mental Health Nursing*. 2011;31(1):14-7.
12. Cahill S, Doran D, Watson M. Guidelines for nursing homes delivering end-of-life care to residents with dementia across the island of Ireland. *Quality in Ageing & Older Adults*. 2012;13(1):60-70.
13. Cairns M. In sickness and in health: An exploration of some of the unconscious processes involved in the decision by family caregivers to place a family member with dementia in residential care. *Psychoanalytic Psychotherapy*. 2012;26(1):34-47.
14. Caron CD, Griffith J, Arcand M. Decision making at the end of life in dementia: How family caregivers perceive their interactions with health care providers in long-term-care settings. *Journal of Applied Gerontology*. 2005;24(3):231-47.
15. Caron CD, Griffith J, Arcand M. End-of-life decision making in dementia: The perspective of family caregivers. *Dementia: The International Journal of Social Research and Practice*. 2005;4(1):113-36.
16. Cronfalk BS, Ternestedt B-M, Norberg A. Being a close family member of a person with dementia living in a nursing home. *Journal Of Clinical Nursing*. 2017.

17. Crowther J, Wilson KCM, Horton S, Lloyd-Williams M. Compassion in healthcare - lessons from a qualitative study of the end of life care of people with dementia. *Journal Of The Royal Society Of Medicine*. 2013;106(12):492-7.
18. Davies N, Rait G, Maio L, Iliffe S. Family caregivers' conceptualisation of quality end-of-life care for people with dementia: A qualitative study. *Palliat Med*. 2016.
19. de Boer ME, Dröes R-M, Jonker C, Eefsting JA, Hertogh CM. Thoughts on the future: The perspectives of elderly people with early-stage Alzheimer's disease and the implications for advance care planning. *AJOB Primary Research*. 2012;3(1):14-22.
20. de Vries K, Sque M, Bryan K, Abu-Saad H. Variant Creutzfeldt-Jakob disease: need for mental health and palliative care team collaboration. *International Journal Of Palliative Nursing*. 2003;9(12):512-20.
21. Dening KH, Greenish W, Jones L, Mandal U, Sampson EL. Barriers to providing end-of-life care for people with dementia: a whole-system qualitative study. *BMJ Supportive & Palliative Care*. 2012;2(2):103-7.
22. Dening KH, Jones L, Sampson EL. Preferences for end-of-life care: a nominal group study of people with dementia and their family carers. *Palliative medicine*. 2013;27(5):409-17.
23. Dening KH, King M, Jones L, Sampson EL. Healthcare decision-making: past present and future, in light of a diagnosis of dementia. *International Journal of Palliative Nursing*. 2017;23(1):4-11.
24. Dickinson C, Bamford C, Exley C, Emmett C, Hughes J, Robinson L. Planning for tomorrow whilst living for today: the views of people with dementia and their families on advance care planning. *International psychogeriatrics*. 2013;25(12):2011-21.
25. Fetherstonhaugh D, McAuliffe L, Bauer M, Shanley C. Decision-making on behalf of people living with dementia: How do surrogate decision-makers decide? *Journal of Medical Ethics: Journal of the Institute of Medical Ethics*. 2017;43(1):35-40.
26. Fleming R, Kelly F, Stillfried G. 'I want to feel at home': Establishing what aspects of environmental design are important to people with dementia nearing the end of life Palliative care in other conditions. *BMC Palliative Care*. 2015;14(1).
27. Forbes DA, Finkelstein S, Blake CM, Gibson M, Morgan DG, Markle-Reid M, et al. Knowledge exchange throughout the dementia care journey by Canadian rural community-based health care practitioners, persons with dementia, and their care partners: an interpretive descriptive study. *Rural And Remote Health*. 2012;12(4):2201-.
28. Forbes S, Bern-Klug M, Gessert C. End-of-Life Decision Making for Nursing Home Residents with Dementia. *Journal of Nursing Scholarship*. 2000;32(3):251-8.
29. Gessert CE, Elliott BA, Peden-McAlpine C. Family Decision-Making for Nursing Home Residents With Dementia: Rural-Urban Differences. *The Journal of Rural Health*. 2006;22(1):1-8.
30. Gessert CE, Forbes S, Bern-Klug M. Planning end-of-life care for patients with dementia: roles of families and health professionals. *Omega*. 2000;42(4):273-91.
31. Givens JL, Lopez RP, Mazor KM, Mitchell SL, Givens JL, Lopez RP, et al. Sources of stress for family members of nursing home residents with advanced dementia. *Alzheimer Disease & Associated Disorders*. 2012;26(3):254-9.
32. Glass AP. Family Caregiving and the Site of Care: Four Narratives About End-of-Life Care for Individuals with Dementia. *Journal Of Social Work In End-Of-Life & Palliative Care*. 2016;12(1-2):23-46.
33. Godwin B, Waters H. 'In solitary confinement': Planning end-of-life well-being with people with advanced dementia, their family and professional carers. *Mortality*. 2009;14(3):265-85.

34. Goodman C, Amador S, Elmore N, Machen I, Mathie E. Preferences and priorities for ongoing and end-of-life care: a qualitative study of older people with dementia resident in care homes. *International Journal Of Nursing Studies*. 2013;50(12):1639-47.
35. Groen-van de Ven L, Smits C, Oldewarris K, Span M, Jukema J, Eefsting J, et al. Decision Trajectories in Dementia Care Networks: Decisions and Related Key Events. *Research On Aging*. 2016.
36. Groen-van de Ven L, Smits C, Span M, Jukema J, Coppoolse K, de Lange J, et al. The challenges of shared decision making in dementia care networks. *International Psychogeriatrics*. 2016:1-15.
37. Hill SR, Mason H, Poole M, Vale L, Robinson L. What is important at the end of life for people with dementia? The views of people with dementia and their carers. *International journal of geriatric psychiatry*. 2016.
38. Hirschman KB, Kapo JM, Karlawish JH. Why doesn't a family member of a person with advanced dementia use a substituted judgment when making a decision for that person? *The American journal of geriatric psychiatry*. 2006;14(8):659-67.
39. Hirschman KB, Kapo JM, Karlawish JH, Hirschman KB, Kapo JM, Karlawish JHT. Identifying the factors that facilitate or hinder advance planning by persons with dementia. *Alzheimer Disease & Associated Disorders*. 2008;22(3):293-8.
40. Gil E, Agmon M, Hirsch A, Ziv M, Zisberg A. Dilemmas for guardians of advanced dementia patients regarding tube feeding. *Age and ageing*. 2018;47(1):138-43.
41. Hovland-Scafe CA, Kramer BJ. Preparedness for Death: How Caregivers of Elders With Dementia Define and Perceive its Value. *The Gerontologist*. 2016.
42. Jennings LA, Palimaru A, Corona MG, Cagigas XE, Ramirez KD, Zhao T, et al. Patient and caregiver goals for dementia care. *Quality Of Life Research: An International Journal Of Quality Of Life Aspects Of Treatment, Care And Rehabilitation*. 2017;26(3):685-93.
43. Jox RJ, Denke E, Hamann J, Mendel R, Forstl H, Borasio GD. Surrogate decision making for patients with end-stage dementia. *International journal of geriatric psychiatry*. 2012;27(10):1045-52.
44. Juozapavicius KP, Weber JA. A reflective study of Alzheimer's caregivers. *American Journal Of Alzheimer's Disease And Other Dementias*. 2001;16(1):11-20.
45. Lamahewa K, Mathew R, Iliffe S, Wilcock J, Manthorpe J, Sampson EL, et al. A qualitative study exploring the difficulties influencing decision making at the end of life for people with dementia. *Health Expectations*. 2018;21(1):118-27.
46. Lawrence V, Samsi K, Murray J, Harari D, Banerjee S. Dying well with dementia: qualitative examination of end-of-life care. *The British Journal Of Psychiatry: The Journal Of Mental Science*. 2011;199(5):417-22.
47. Lewis LF. Caregivers' experiences seeking hospice care for loved ones with dementia. *Qualitative Health Research*. 2014;24(9):1221-31.
48. Lewis LF. Caregiving for a Loved One With Dementia at the End of Life. *American Journal of Alzheimer's Disease & Other Dementias*. 2015;30(5):488-96.
49. Livingston G, Leavey G, Manela M, Livingston D, Rait G, Sampson E, et al. Making decisions for people with dementia who lack capacity: qualitative study of family carers in UK. *BMJ (Clinical Research Ed)*. 2010;341:c4184-c.
50. Livingston G, Lewis-Holmes E, Pitfield C, Manela M, Chan D, Constant E, et al. Improving the end-of-life for people with dementia living in a care home: an intervention study. *International Psychogeriatrics*. 2013;25(11):1849-58.
51. Mann E, Goff SL, Colon-Cartagena W, Bellantonio S, Rothberg MB. Do-not-hospitalize orders for individuals with advanced dementia: healthcare proxies' perspectives. *Journal Of The American Geriatrics Society*. 2013;61(9):1568-73.



52. Muders P, Zahrt-Omar CA, Busmann S, Haberstroh J, Weber M. Support for families of patients dying with dementia: a qualitative analysis of bereaved family members' experiences and suggestions. *Palliative & Supportive Care*. 2015;13(3):435-42.
53. Mulqueen K, Coffey A. Preferences of residents with dementia for end of life care. *Nursing Older People*. 2017;29(2):26-30.
54. Noh H, Kwak J. End-of-life decision making for persons with dementia: Proxies' perception of support. *Dementia (London, England)*. 2016.
55. Pasman HRW, The BAM, Onwuteaka-Philipsen BD, Ribbe MW, van der Wal G. Participants in the decision making on artificial nutrition and hydration to demented nursing home patients: A qualitative study. *Journal of Aging Studies*. 2004;18(3):321-35.
56. Peacock S, Duggleby W, Koop P. The lived experience of family caregivers who provided end-of-life care to persons with advanced dementia. *Palliative & Supportive Care*. 2014;12(2):117-26.
57. Peacock SC, Hammond-Collins K, Forbes DA. The journey with dementia from the perspective of bereaved family caregivers: a qualitative descriptive study. *BMC Nursing*. 2014;13(1):42-.
58. Poole M, Bamford C, McLellan E, Lee RP, Exley C, Hughes JC, et al. End-of-life care: A qualitative study comparing the views of people with dementia and family carers. *Palliat Med*. 2017;0(0):12.
59. Poppe M, Burleigh S, Banerjee S. Qualitative evaluation of advanced care planning in early dementia (ACP-ED). *Plos One*. 2013;8(4):e60412-e.
60. Powers BA, Watson NM. Meaning and practice of palliative care for nursing home residents with dementia at end of life. *American Journal Of Alzheimer's Disease And Other Dementias*. 2008;23(4):319-25.
61. Robinson EM. Wives' struggle in living through treatment decisions for husbands with advanced Alzheimer's disease. *Journal Of Nursing Law*. 2000;7(1):21-39.
62. Rosemond C, Hanson LC, Zimmerman S. Goals of Care or Goals of Trust? How Family Members Perceive Goals for Dying Nursing Home Residents. *Journal Of Palliative Medicine*. 2017;20(4):360-5.
63. Russell C, Middleton H, Shanley C. Dying with dementia: the views of family caregivers about quality of life. *Australasian Journal On Ageing*. 2008;27(2):89-92.
64. Saini G, Sampson EL, Davis S, Kupeli N, Harrington J, Leavey G, et al. An ethnographic study of strategies to support discussions with family members on end-of-life care for people with advanced dementia in nursing homes. *BMC Palliative Care*. 2016;15:55-.
65. Samia LW, Hepburn K, Nichols L. "Flying by the seat of our pants": what dementia family caregivers want in an advanced caregiver training program. *Research In Nursing & Health*. 2012;35(6):598-609.
66. Sanders S, Butcher HK, Swails P, Power J. Portraits of caregivers of end-stage dementia patients receiving hospice care. *Death Studies*. 2009;33(6):521-56.
67. Sarabia-Cobo CM, Pérez V, de Lorena P, Nuñez MJ, Domínguez E. Decisions at the end of life made by relatives of institutionalized patients with dementia. *Applied Nursing Research: ANR*. 2016;31:e6-e10.
68. Shanley C, Fetherstonhaugh D, McAuliffe L, Bauer M, Beattie E. Providing support to surrogate decision-makers for people living with dementia: Healthcare professional, organisational and community responsibilities. *Health & Social Care In The Community*. 2017.
69. Shanley C, Russell C, Middleton H, Simpson-Young V. Living through end-stage dementia: The experiences and expressed needs of family carers. *Dementia (14713012)*. 2011;10(3):325-40.

70. Shuter P, Beattie E, Edwards H. An exploratory study of grief and health-related quality of life for caregivers of people with dementia. *American Journal of Alzheimer's Disease and other Dementias*. 2014;29(4):379-85.
71. Slape J. Dementia and palliative care: The spiritual needs of family members. *Journal of Religion, Spirituality & Aging*. 2014;26(2-3):215-30.
72. Snyder EA, Caprio AJ, Wessell K, Lin FC, Hanson LC. Impact of a decision aid on surrogate decision-makers' perceptions of feeding options for patients with dementia. *Journal Of The American Medical Directors Association*. 2013;14(2):114-8.
73. Stewart F, Goddard C, Schiff R, Hall S. Advanced care planning in care homes for older people: a qualitative study of the views of care staff and families. *Age And Ageing*. 2011;40(3):330-5.
74. Stewart-Archer LA, Afghani A, Toye CM, Gomez FA. Dialogue on Ideal End-of-Life Care for Those With Dementia. *The American Journal Of Hospice & Palliative Care*. 2015;32(6):620-30.
75. Stirling C, McLnerney F, Andrews S, Ashby M, Toye C, Donohue C, et al. A tool to aid talking about dementia and dying--development and evaluation. *Collegian (Royal College Of Nursing, Australia)*. 2014;21(4):337-43.
76. Tarter R, Demiris G, Pike K, Washington K, Parker Oliver D. Pain in Hospice Patients With Dementia: The Informal Caregiver Experience. *American Journal Of Alzheimer's Disease And Other Dementias*. 2016;31(6):524-9.
77. The AM, Pasman R, Onwuteaka-Philipsen B, Ribbe M, Van der Wal G. Withholding the artificial administration of fluids and food from elderly patients with dementia: Ethnographic study. *British Medical Journal*. 2002;325(7376):1326-9.
78. Thuné-Boyle IC, Sampson EL, Jones L, King M, Lee DR, Blanchard MR. Challenges to improving end of life care of people with advanced dementia in the UK. *Dementia*. 2010;9(2):259-84.
79. Treloar A, Crugel M, Adamis D. Palliative and end of life care of dementia at home is feasible and rewarding: results from the 'Hope for Home' study. *Dementia (14713012)*. 2009;8(3):335-47.
80. Van der Steen JT, Lemos Dekker N, Gijsberts MJHE, Vermeulen LH, Mahler MM, The BAM. Palliative care for people with dementia in the terminal phase: a mixed-methods qualitative study to inform service development. *BMC Palliat Care [Internet]*. 2017 [cited 2018 Jan 16];16 (1)(28).
81. van Soest-Poortvliet MC, van der Steen JT, Gutschow G, Deliëns L, Onwuteaka-Philipsen BD, de Vet HCW, et al. Advance Care Planning in Nursing Home Patients With Dementia: A Qualitative Interview Study Among Family and Professional Caregivers. *Journal Of The American Medical Directors Association*. 2015;16(11):979-89.
82. Volicer L, Stets K. Acceptability of an Advance Directive That Limits Food and Liquids in Advanced Dementia. *The American journal of hospice & palliative care*. 2016;33(1):55-63.
83. Wakunami M, Kawabata H, Murakami M, Maezawa M. Families' acceptance of near death: a qualitative study of the process for introducing end-of-life care. *Geriatrics & Gerontology International*. 2009;9(2):140-7.
84. Wladkowski SP. Live Discharge from Hospice and the Grief Experience of Dementia Caregivers. *Journal of Social Work in End-of-Life & Palliative Care*. 2016;12(1/2):47-62.
